# Supplementary material
Source: publisher figshare collection journal article supplement (https://acs.figshare.com/ndownloader/files/7515139)
Supplement: Supplementary file 1 [file 7515139]

## Supporting information

### Oriented Attachment of Calcite Nanocrystals: Formation of Single-Crystalline Configurations as 3D Bundles via Lateral Stacking of 1D Chains

Mihiro Takasaki, Yuya Oaki, and Hiroaki Imai\*

Department of Applied Chemistry, Faculty of Science and Technology, Keio University, 3-14-1 Hiyoshi, Kohoku-ku, Yokohama 223-8522, Japan  
E-mail: hiroaki@applied.keio.jp

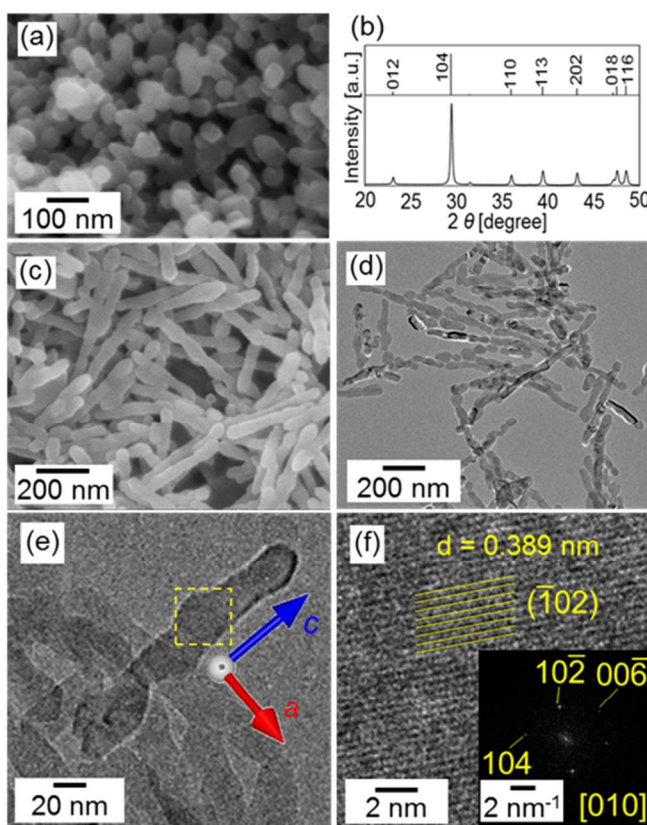

Fig. S1 An SEM image (a) and a typical XRD pattern (b) of nanoblocks in an aqueous dispersion at pH 12 after carbonation; SEM and TEM images and an HRTEM image with an FFT pattern of nanorods in an aqueous dispersion at pH 12 and at 25°C after stirring for 120 h (c), 336 h (d), and 720 h (e, f). Reproduced from Ref. 35 with permission.

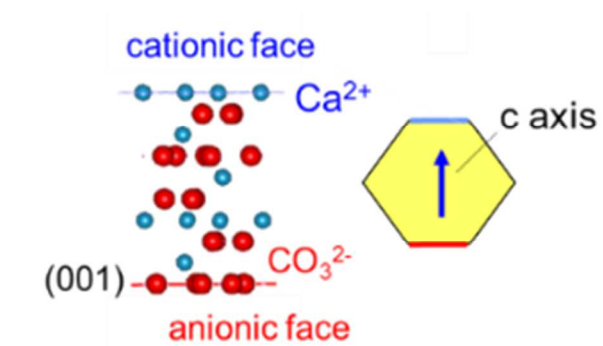

Fig. S2 A schematic illustration of a calcite nanoblock with its ionic configuration. Reproduced from Ref. 35 with permission.
